# Supplementary material for: Natural flavonoid apigenin and xanthoangelol E are potent antivirals against human metapneumovirus: an in-silico study
Source: Research Square preprint supplement (doi:10.21203/rs.3.rs-6892264/v1), 2025-06-18
Supplement: Supplementary file 1 [file cdfe7d3e355108851c7de3d6.docx]

**Supplementary Figure 1.** Predicted proteins structures stability by the ERRAT2 and ProSA. The first column provided the Z-scores and the seconf column provided the plot of residue scores. Part A, C for Human metapneumovirus fusion (hMPV-F) protein and Part B, D Human metapneumovirus nucleoprotein (hMPV-N).


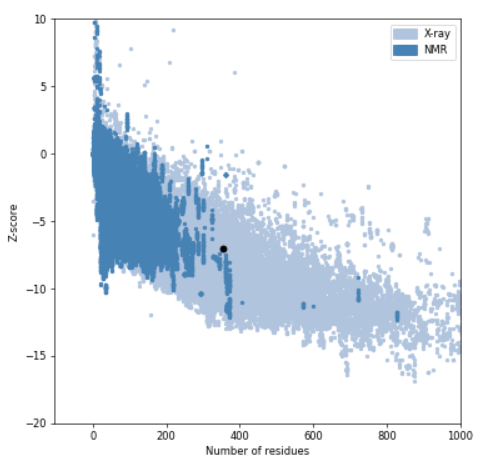

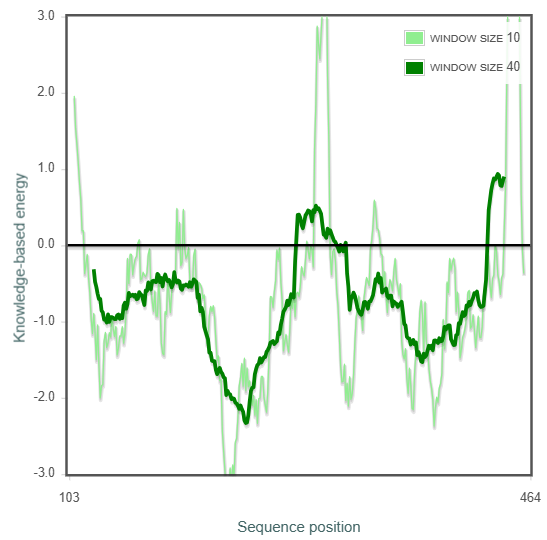

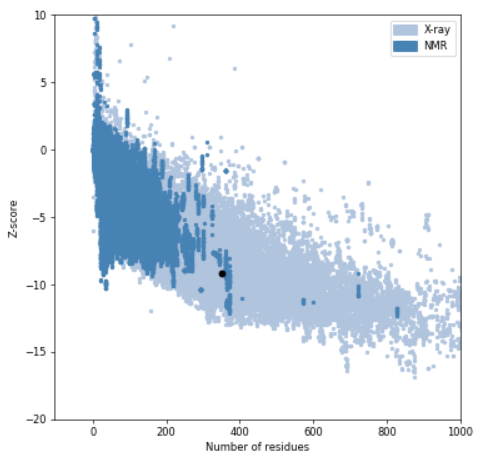

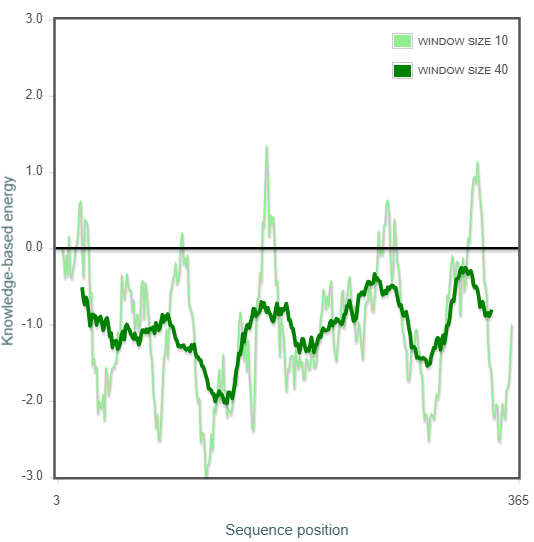

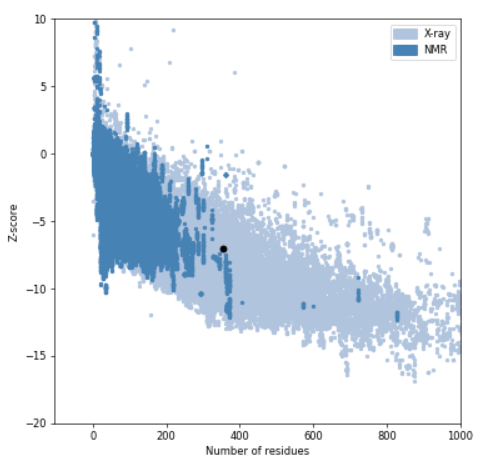

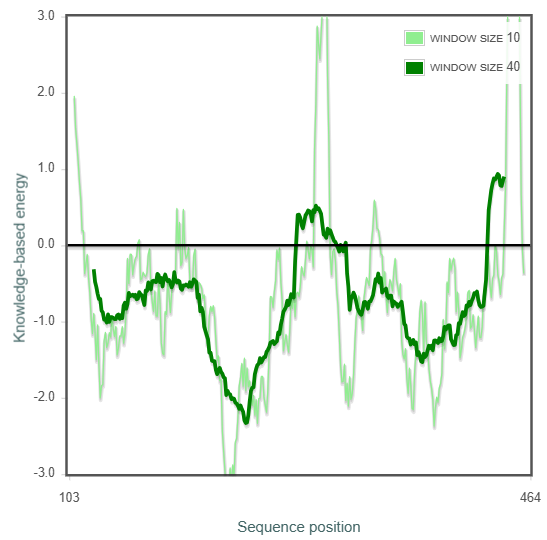

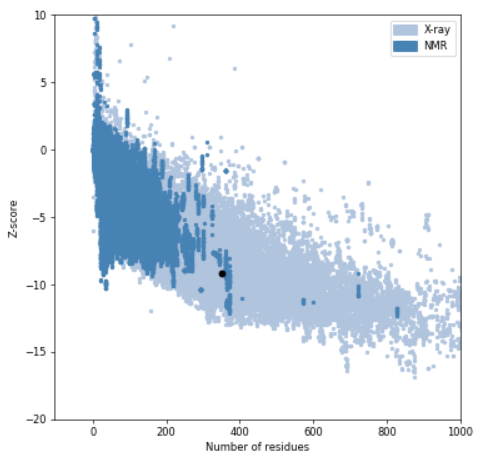

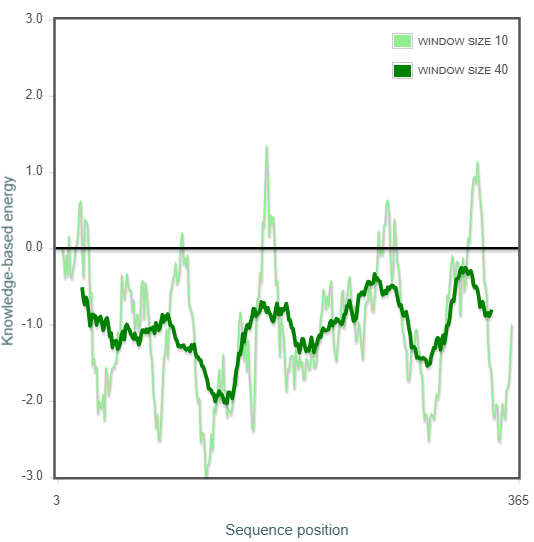


A.

B.

C.

D.

**Supplementary Figure 2.** Ramachandran plot for A. hMPV-F protein and B. hMPV-N
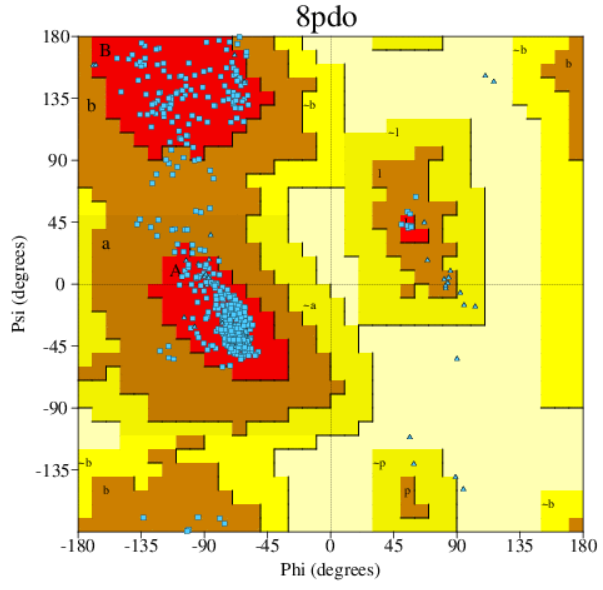

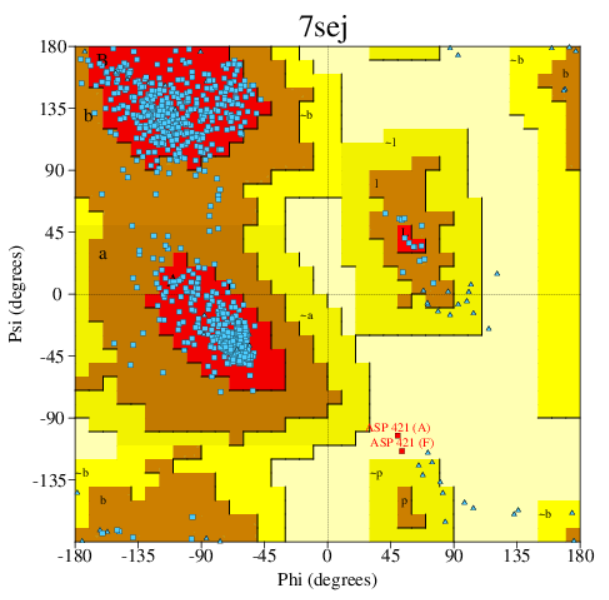
.

B.

A.
